# Supplementary material
Source: PubMed Central journal article supplement (PMC8442544)
Supplement: NIHMS1720322-supplement-Suppl_Table_1.pdf [file NIHMS1720322-supplement-Suppl_Table_1.pdf]

In the format provided by the authors and unedited.

# A midline thalamic circuit determines reactions to visual threat

Lindsey D. Salay<sup>1</sup>, Nao Ishiko<sup>1</sup> & Andrew D. Huberman<sup>1,2,3,4\*</sup>

---

<sup>1</sup>Department of Neurobiology, Stanford University School of Medicine, Palo Alto, CA, USA. <sup>2</sup>Stanford Neurosciences Institute, Stanford University School of Medicine, Palo Alto, CA, USA. <sup>3</sup>BioX, Stanford University School of Medicine, Palo Alto, CA, USA. <sup>4</sup>Department of Ophthalmology, Stanford University School of Medicine, Palo Alto, CA, USA. \*e-mail: [adh1@stanford.edu](mailto:adh1@stanford.edu)

| Figure           | Description     | Sample size (figure order) | Normality test | Statistical test                 | Treatment effect                  | P value    | Significance |
|------------------|-----------------|----------------------------|----------------|----------------------------------|-----------------------------------|------------|--------------|
| <b>Figure 1b</b> | % of time       | n= 15, 15, 5 mice          |                |                                  |                                   |            |              |
|                  | freezing        |                            | not passed     | Kruskal-Wallis one-way ANOVA     | Kruskal-Wallis statistic = 17.69  | P = 0.0001 | ***          |
|                  |                 |                            |                | Dunn's multiple comparisons test | Mean rank diff.                   |            |              |
|                  | none vs. above  |                            |                |                                  | -11.67                            | P=0.0003   | ***          |
|                  | below vs. above |                            |                |                                  | -11.67                            | P=0.0162   | *            |
|                  | none vs. below  |                            |                |                                  | 0                                 | P>0.9999   | ns           |
|                  | hiding          |                            | not passed     | Kruskal-Wallis one-way ANOVA     | Kruskal-Wallis statistic = 6.533  | P = 0.0381 | *            |
|                  |                 |                            |                | Dunn's multiple comparisons test | Mean rank diff.                   |            |              |
|                  | none vs. above  |                            |                |                                  | -5.9                              | P=0.2810   | ns           |
|                  | below vs. above |                            |                |                                  | 6.033                             | P=0.6763   | ns           |
|                  | none vs. below  |                            |                |                                  | -11.93                            | P=0.05     | ns           |
|                  | ambulatory      |                            | not passed     | Kruskal-Wallis one-way ANOVA     | Kruskal-Wallis statistic = 28.181 | P < 0.0001 | ***          |
|                  |                 |                            |                | Dunn's multiple comparisons test | Mean rank diff.                   |            |              |
|                  | none vs. above  |                            |                |                                  | 19.8375                           | P<0.0001   | ***          |
|                  | below vs. above |                            |                |                                  | 11.4                              | P=0.1017   | ns           |
|                  | none vs. below  |                            |                |                                  | 8.4375                            | P=0.3407   | ns           |
|                  | running         |                            | not passed     | Kruskal-Wallis one-way ANOVA     | Kruskal-Wallis statistic = 7.527  | P = 0.0232 | *            |
|                  |                 |                            |                | Dunn's multiple comparisons test | Mean rank diff.                   |            |              |
|                  | none vs. above  |                            |                |                                  | -5.833                            | P=0.0308   | *            |
|                  | below vs. above |                            |                |                                  | -5.833                            | P=0.2087   | ns           |
|                  | none vs. below  |                            |                |                                  | 0                                 | P>0.9999   | ns           |
|                  | tail rattling   |                            | not passed     | Kruskal-Wallis one-way ANOVA     | Kruskal-Wallis statistic = 5.825  | P = 0.0543 | ns           |
|                  |                 |                            |                | Dunn's multiple comparisons test | Mean rank diff.                   |            |              |
|                  | none vs. above  |                            |                |                                  | -4.667                            | P=0.0719   | ns           |
|                  | below vs. above |                            |                |                                  | -4.667                            | P=0.3312   | ns           |
|                  | none vs. below  |                            |                |                                  | 0                                 | P>0.9999   | ns           |

|                  |                                   |                 |        |                                   |                  |          |     |
|------------------|-----------------------------------|-----------------|--------|-----------------------------------|------------------|----------|-----|
| <b>Figure 1c</b> | number of c-Fos+ cells in the vMT | n= 7,10, 5 mice | passed | one-way ANOVA                     | $F_{2,19}=11.63$ | P=0.0005 | *** |
|                  | above vs. none                    |                 |        | Tukey's multiple comparisons test |                  | P=0.0005 | *** |
|                  | above vs. below                   |                 |        | Tukey's multiple comparisons test |                  | P=0.0061 | **  |
|                  | none vs. below                    |                 |        | Tukey's multiple comparisons test |                  | P=0.9239 | ns  |

|                  |                                  |                 |        |                                   |                  |          |     |
|------------------|----------------------------------|-----------------|--------|-----------------------------------|------------------|----------|-----|
| <b>Figure 1d</b> | number of c-Fos+ cells in the Xi | n= 7,10, 5 mice | passed | one-way ANOVA                     | $F_{2,19}=19.75$ | P<0.0001 | *** |
|                  | above vs. none                   |                 |        | Tukey's multiple comparisons test |                  | P<0.0001 | *** |
|                  | above vs. below                  |                 |        | Tukey's multiple comparisons test |                  | P=0.0001 | *** |
|                  | none vs. below                   |                 |        | Tukey's multiple comparisons test |                  | P=0.7852 | ns  |

|                  |                   |                   |            |                                  |                                  |            |    |
|------------------|-------------------|-------------------|------------|----------------------------------|----------------------------------|------------|----|
| <b>Figure 2i</b> | % of time         | n= 24, 9, 15 mice |            |                                  |                                  |            |    |
|                  | freezing          |                   | not passed | Kruskal-Wallis one-way ANOVA     | Kruskal-Wallis statistic = 1.905 | P = 0.3858 | ns |
|                  |                   |                   |            | Dunn's multiple comparisons test | Mean rank diff.                  |            |    |
|                  | controls vs. hM4D |                   |            |                                  | -1.517                           | P>0.9999   | ns |
|                  | controls vs. hM3D |                   |            |                                  | 5.367                            | P=0.7220   | ns |
|                  | hM4D vs. hM3D     |                   |            |                                  | 6.883                            | P=0.6750   | ns |
|                  | hiding            |                   | not passed | Kruskal-Wallis one-way ANOVA     | Kruskal-Wallis statistic = 1.574 | P = 0.4552 | ns |
|                  |                   |                   |            | Dunn's multiple comparisons test | Mean rank diff.                  |            |    |

|  |                   |  |            |                                  |                                  |              |     |
|--|-------------------|--|------------|----------------------------------|----------------------------------|--------------|-----|
|  | controls vs. hM4D |  |            |                                  | 2.554                            | $P > 0.9999$ | ns  |
|  | controls vs. hM3D |  |            |                                  | 5.39                             | $P = 0.6356$ | ns  |
|  | hM3D vs. hM4D     |  |            |                                  | -2.836                           | $P > 0.9999$ | ns  |
|  | ambulatory        |  | not passed | Kruskal-Wallis one-way ANOVA     | Kruskal-Wallis statistic = 11.51 | $P = 0.0032$ | **  |
|  |                   |  |            | Dunn's multiple comparisons test | Mean rank diff.                  |              |     |
|  | controls vs. hM4D |  |            |                                  | -1.113                           | $P > 0.9999$ | ns  |
|  | controls vs. hM3D |  |            |                                  | -14.98                           | $P = 0.0033$ | **  |
|  | hM3D vs. hM4D     |  |            |                                  | 13.87                            | $P = 0.0449$ | *   |
|  | running           |  | not passed | Kruskal-Wallis one-way ANOVA     | Kruskal-Wallis statistic = 1.639 | $P = 0.4407$ | ns  |
|  |                   |  |            | Dunn's multiple comparisons test | Mean rank diff.                  |              |     |
|  | controls vs. hM4D |  |            |                                  | 2.942                            | $P > 0.9999$ | ns  |
|  | controls vs. hM3D |  |            |                                  | -3.458                           | $P > 0.9999$ | ns  |
|  | hM4D vs. hM3D     |  |            |                                  | -6.4                             | $P = 0.6283$ | ns  |
|  | tail rattling     |  | not passed | Kruskal-Wallis one-way ANOVA     | Kruskal-Wallis statistic = 14.58 | $P = 0.0007$ | *** |
|  |                   |  |            | Dunn's multiple comparisons test | Mean rank diff.                  |              |     |
|  | controls vs. hM4D |  |            |                                  | 6.229                            | $P = 0.5169$ | ns  |
|  | controls vs. hM3D |  |            |                                  | -11.57                           | $P = 0.0112$ | *   |
|  | hM4D vs. hM3D     |  |            |                                  | -17.8                            | $P = 0.0010$ | *** |

|                  |                   |                      |            |                      |                       |                 |     |
|------------------|-------------------|----------------------|------------|----------------------|-----------------------|-----------------|-----|
| <b>Figure 2j</b> | number of events  | $n = 24, 9, 15$ mice |            |                      |                       |                 |     |
|                  | running           |                      | not passed | Poisson GLM          | $\chi^2_{2,46} = 7.2$ | $P = 0.02851$   | *   |
|                  |                   |                      |            | pairwise comparisons |                       |                 |     |
|                  | controls vs. hM4D |                      |            |                      |                       | $P = 0.51525$   | ns  |
|                  | controls vs. hM3D |                      |            |                      |                       | $P = 0.03103$   | *   |
|                  | hM4D vs. hM3D     |                      |            |                      |                       | $P = 0.0438$    | *   |
|                  | tail rattling     |                      | not passed | Quasi-Poisson GLM    | $F_{2,46} = 16.075$   | $P = 0.000005$  | *** |
|                  |                   |                      |            | pairwise comparisons |                       |                 |     |
|                  | controls vs. hM4D |                      |            |                      |                       | $P = 0.164$     | ns  |
|                  | controls vs. hM3D |                      |            |                      |                       | $P = 0.0003$    | *** |
|                  | hM4D vs. hM3D     |                      |            |                      |                       | $P = 0.0000004$ | *** |

|                  |                    |                      |  |                     |  |              |    |
|------------------|--------------------|----------------------|--|---------------------|--|--------------|----|
| <b>Figure 2k</b> | % of mice rattling | $n = 24, 9, 15$ mice |  |                     |  |              |    |
|                  | controls vs. hM4D  |                      |  | Fisher's exact test |  | $P = 0.1747$ | ns |
|                  | controls vs. hM3D  |                      |  | Fisher's exact test |  | $P = 0.0079$ | ** |
|                  | hM4D vs. hM3D      |                      |  | Fisher's exact test |  | $P = 0.0020$ | ** |

|                  |                                  |                         |  |                     |  |              |     |
|------------------|----------------------------------|-------------------------|--|---------------------|--|--------------|-----|
| <b>Figure 2l</b> | % of rattling events in the open | $n = 14, 0, 53$ rattles |  |                     |  |              |     |
|                  | controls vs. hM3D                |                         |  | Fisher's exact test |  | $P < 0.0001$ | *** |

|                  |                          |                          |  |                     |  |                  |     |
|------------------|--------------------------|--------------------------|--|---------------------|--|------------------|-----|
| <b>Figure 2m</b> | % of running in the open | <i>n</i> =11, 3, 16 runs |  |                     |  |                  |     |
|                  | controls vs. hM4D        |                          |  | Fisher's exact test |  | <i>P</i> >0.9999 | ns  |
|                  | controls vs. hM3D        |                          |  | Fisher's exact test |  | <i>P</i> =0.0003 | *** |
|                  | hM4D vs. hM3D            |                          |  | Fisher's exact test |  | <i>P</i> =0.0206 | *   |

|                  |                   |                           |            |                                  |                                  |                   |     |
|------------------|-------------------|---------------------------|------------|----------------------------------|----------------------------------|-------------------|-----|
| <b>Figure 2n</b> | % time motile     | <i>n</i> = 24, 9, 15 mice |            |                                  |                                  |                   |     |
|                  |                   |                           | not passed | Kruskal-Wallis one-way ANOVA     | Kruskal-Wallis statistic = 15.58 | <i>P</i> = 0.0004 | *** |
|                  |                   |                           |            | Dunn's multiple comparisons test | Mean rank diff.                  |                   |     |
|                  | controls vs. hM4D |                           |            |                                  | -0.3042                          | <i>P</i> >0.9999  | ns  |
|                  | controls vs. hM3D |                           |            |                                  | -17.29                           | <i>P</i> =0.0006  | *** |
|                  | hM3D vs. hM4D     |                           |            |                                  | 16.98                            | <i>P</i> =0.0093  | **  |

|                  |                                |                            |            |                                  |                                  |                   |    |
|------------------|--------------------------------|----------------------------|------------|----------------------------------|----------------------------------|-------------------|----|
| <b>Figure 3q</b> | % of time                      | <i>n</i> = 14, 8,8, 5 mice |            |                                  |                                  |                   |    |
|                  | freezing                       |                            | not passed | Kruskal-Wallis one-way ANOVA     | Kruskal-Wallis statistic = 7.012 | <i>P</i> = 0.0715 | ns |
|                  |                                |                            |            | Dunn's multiple comparisons test | Mean rank diff.                  |                   |    |
|                  | controls vs. vMT-BLA           |                            |            |                                  | -7.598                           | <i>P</i> =0.2503  | ns |
|                  | controls vs. vMT-PFC           |                            |            |                                  | -3.286                           | <i>P</i> >0.9999  | ns |
|                  | controls vs. vMT-PFC terminals |                            |            |                                  | 6.664                            | <i>P</i> =0.5895  | ns |
|                  | hiding                         |                            | not passed | Kruskal-Wallis one-way ANOVA     | Kruskal-Wallis statistic = 3.153 | <i>P</i> = 0.3686 | ns |
|                  |                                |                            |            | Dunn's multiple comparisons test | Mean rank diff.                  |                   |    |
|                  | controls vs. vMT-BLA           |                            |            |                                  | 6.045                            | <i>P</i> =0.3174  | ns |
|                  | controls vs. vMT-PFC           |                            |            |                                  | 0.607                            | <i>P</i> >0.9999  | ns |
|                  | controls vs. vMT-PFC terminals |                            |            |                                  | 4.107                            | <i>P</i> >0.9999  | ns |
|                  | ambulatory                     |                            | not passed | Kruskal-Wallis one-way ANOVA     | Kruskal-Wallis statistic = 6.577 | <i>P</i> = 0.0867 | ns |
|                  |                                |                            |            | Dunn's multiple comparisons test | Mean rank diff.                  |                   |    |
|                  | controls vs. vMT-BLA           |                            |            |                                  | 4.786                            | <i>P</i> =0.7688  | ns |
|                  | controls vs. vMT-PFC           |                            |            |                                  | 5.973                            | <i>P</i> =0.4695  | ns |
|                  | controls vs. vMT-PFC terminals |                            |            |                                  | -6.464                           | <i>P</i> =0.5762  | ns |
|                  | running                        |                            | not passed | Kruskal-Wallis one-way ANOVA     | Kruskal-Wallis statistic = 8.423 | <i>P</i> = 0.0380 | *  |
|                  |                                |                            |            | Dunn's multiple comparisons test | Mean rank diff.                  |                   |    |
|                  | controls vs. vMT-BLA           |                            |            |                                  | 3.83                             | <i>P</i> =0.9332  | ns |
|                  | controls vs. vMT-PFC           |                            |            |                                  | 1.768                            | <i>P</i> >0.9999  | ns |
|                  | controls vs. vMT-PFC terminals |                            |            |                                  | -9.707                           | <i>P</i> =0.0869  | ns |
|                  | tail rattling                  |                            | not passed | Kruskal-Wallis one-way ANOVA     | Kruskal-Wallis statistic = 10.83 | <i>P</i> = 0.0127 | *  |
|                  |                                |                            |            | Dunn's multiple comparisons test | Mean rank diff.                  |                   |    |
|                  | controls vs. vMT-BLA           |                            |            |                                  | 2.741                            | <i>P</i> >0.9999  | ns |
|                  | controls vs. vMT-PFC           |                            |            |                                  | -3.759                           | <i>P</i> >0.9999  | ns |

|  |                                |  |  |  |        |          |   |
|--|--------------------------------|--|--|--|--------|----------|---|
|  | controls vs. vMT-PFC terminals |  |  |  | -12.87 | P=0.0160 | * |
|--|--------------------------------|--|--|--|--------|----------|---|

|                  |                                |                  |            |                      |                       |            |    |
|------------------|--------------------------------|------------------|------------|----------------------|-----------------------|------------|----|
| <b>Figure 3r</b> | number of events               | n= 14, 8, 5 mice |            |                      |                       |            |    |
|                  | running                        |                  | not passed | Poisson GLM          | $\chi^2_{3,31} = 7.8$ | P=0.04935  | *  |
|                  |                                |                  |            | pairwise comparisons |                       |            |    |
|                  | controls vs. vMT-BLA           |                  |            |                      |                       | P=0.3378   | ns |
|                  | controls vs. vMT-PFC           |                  |            |                      |                       | P=0.6699   | ns |
|                  | controls vs. vMT-PFC terminals |                  |            |                      |                       | P=0.0453   | *  |
|                  | tail rattling                  |                  | not passed | Quasi-Poisson GLM    | $F_{3,31} = 5.2864$   | P=0.004626 | ** |
|                  |                                |                  |            | pairwise comparisons |                       |            |    |
|                  | controls vs. vMT-BLA           |                  |            |                      |                       | P=0.4183   | ns |
|                  | controls vs. vMT-PFC           |                  |            |                      |                       | P=0.0275   | *  |
|                  | controls vs. vMT-PFC terminals |                  |            |                      |                       | P=0.0133   | *  |

|                  |                              |                    |            |                                  |                                  |            |    |
|------------------|------------------------------|--------------------|------------|----------------------------------|----------------------------------|------------|----|
| <b>Figure 4e</b> | % of time                    | n= 36, 17, 15 mice |            |                                  |                                  |            |    |
|                  | freezing                     |                    | not passed | Kruskal-Wallis one-way ANOVA     | Kruskal-Wallis statistic = 5.587 | P = 0.0612 | ns |
|                  |                              |                    |            | Dunn's multiple comparisons test | Mean rank diff.                  |            |    |
|                  | controls vs. co-activate     |                    |            |                                  | 13.13                            | P=0.0363   | *  |
|                  | controls vs. pre-activate    |                    |            |                                  | 3.825                            | P>0.9999   | ns |
|                  | pre-activate vs. co-activate |                    |            |                                  | -9.3                             | P=0.4929   | ns |
|                  | hiding                       |                    | not passed | Kruskal-Wallis one-way ANOVA     | Kruskal-Wallis statistic = 1.201 | P = 0.5486 | ns |
|                  |                              |                    |            | Dunn's multiple comparisons test | Mean rank diff.                  |            |    |
|                  | controls vs. co-activate     |                    |            |                                  | -6.119                           | P=0.8195   | ns |
|                  | controls vs. pre-activate    |                    |            |                                  | -2.006                           | P>0.9999   | ns |
|                  | pre-activate vs. co-activate |                    |            |                                  | 4.114                            | P>0.9999   | ns |
|                  | ambulatory                   |                    | not passed | Kruskal-Wallis one-way ANOVA     | Kruskal-Wallis statistic = 3.257 | P = 0.1962 | ns |
|                  |                              |                    |            | Dunn's multiple comparisons test | Mean rank diff.                  |            |    |
|                  | controls vs. co-activate     |                    |            |                                  | -10.42                           | P=0.2134   | ns |
|                  | controls vs. pre-activate    |                    |            |                                  | -3.172                           | P>0.9999   | ns |
|                  | co-activate vs. pre-activate |                    |            |                                  | 7.251                            | P=0.8911   | ns |
|                  | running                      |                    | not passed | Kruskal-Wallis one-way ANOVA     | Kruskal-Wallis statistic = 10.48 | P = 0.0053 | ** |
|                  |                              |                    |            | Dunn's multiple comparisons test | Mean rank diff.                  |            |    |
|                  | controls vs. co-activate     |                    |            |                                  | -16.84                           | P=0.0041   | ** |
|                  | controls vs. pre-activate    |                    |            |                                  | -7.797                           | P=0.4663   | ns |
|                  | co-activate vs. pre-activate |                    |            |                                  | 9.045                            | P=0.4585   | ns |

|  |                              |  |            |                                  |                                  |              |    |
|--|------------------------------|--|------------|----------------------------------|----------------------------------|--------------|----|
|  | tail rattling                |  | not passed | Kruskal-Wallis one-way ANOVA     | Kruskal-Wallis statistic = 7.781 | $P = 0.0204$ | *  |
|  |                              |  |            | Dunn's multiple comparisons test | Mean rank diff.                  |              |    |
|  | controls vs. co-activate     |  |            |                                  | -14.86                           | $P = 0.0236$ | *  |
|  | controls vs. pre-activate    |  |            |                                  | -9.472                           | $P = 0.3145$ | ns |
|  | co-activate vs. pre-activate |  |            |                                  | 5.392                            | $P > 0.9999$ | ns |

|                  |                              |                       |            |                      |                        |                |     |
|------------------|------------------------------|-----------------------|------------|----------------------|------------------------|----------------|-----|
| <b>Figure 4f</b> | number of events             | $n = 36, 17, 15$ mice |            |                      |                        |                |     |
|                  | tail rattling                |                       | not passed | Quasi-Poisson GLM    | $F_{2,65} = 5.1249$    | $P = 0.008576$ | **  |
|                  |                              |                       |            | pairwise comparisons |                        |                |     |
|                  | controls vs. co-activate     |                       |            |                      |                        | $P = 0.00342$  | **  |
|                  | controls vs. pre-activate    |                       |            |                      |                        | $P = 0.04222$  | *   |
|                  | pre-activate vs. co-activate |                       |            |                      |                        | $P = 0.45556$  | ns  |
|                  | running                      |                       | not passed | Poisson GLM          | $\chi^2_{2,65} = 11.7$ | $P = 0.002832$ | **  |
|                  |                              |                       |            | pairwise comparisons |                        |                |     |
|                  | controls vs. co-activate     |                       |            |                      |                        | $P = 0.000999$ | *** |
|                  | controls vs. pre-activate    |                       |            |                      |                        | $P = 0.034170$ | *   |
|                  | pre-activate vs. co-activate |                       |            |                      |                        | $P = 0.362390$ | ns  |

|                  |                              |                       |            |                                  |                                  |              |    |
|------------------|------------------------------|-----------------------|------------|----------------------------------|----------------------------------|--------------|----|
| <b>Figure 4g</b> | % of time                    | $n = 36, 17, 15$ mice |            |                                  |                                  |              |    |
|                  | motile                       |                       | not passed | Kruskal-Wallis one-way ANOVA     | Kruskal-Wallis statistic = 8.806 | $P = 0.0122$ | *  |
|                  |                              |                       |            | Dunn's multiple comparisons test | Mean rank diff.                  |              |    |
|                  | controls vs. co-activate     |                       |            |                                  | -16.71                           | $P = 0.0099$ | ** |
|                  | controls vs. pre-activate    |                       |            |                                  | -7.855                           | $P = 0.5561$ | ns |
|                  | pre-activate vs. co-activate |                       |            |                                  | 8.851                            | $P = 0.5748$ | ns |

|                  |                                         |                   |            |                                |            |              |   |
|------------------|-----------------------------------------|-------------------|------------|--------------------------------|------------|--------------|---|
| <b>Figure 4k</b> | % of time freezing in response to sweep | $n = 15, 10$ mice |            |                                |            |              |   |
|                  | controls vs. co-activate                |                   | not passed | Mann-Whitney test (two-tailed) | $U = 37.5$ | $P = 0.0306$ | * |

|                  |                                             |                                                                  |            |                                  |                             |              |    |
|------------------|---------------------------------------------|------------------------------------------------------------------|------------|----------------------------------|-----------------------------|--------------|----|
| <b>Figure 5c</b> | relative pupil size (constant light)        | $n = 12$ mice Chr2 activate; $n = 8$ mice controls (dashed line) | not passed | Friedman's test                  | Friedman's statistic = 12.5 | $P = 0.0019$ | ** |
|                  |                                             |                                                                  |            | Dunn's multiple comparisons test | Mean rank diff.             |              |    |
|                  | before vs. laser on (during vMT activation) |                                                                  |            |                                  | -15                         | $P = 0.0044$ | ** |
|                  | before vs. laser off (after vMT activation) |                                                                  |            |                                  | -15                         | $P = 0.0044$ | ** |

|                  |                                    |                                                                 |        |                                    |                        |                  |     |
|------------------|------------------------------------|-----------------------------------------------------------------|--------|------------------------------------|------------------------|------------------|-----|
| <b>Figure 5e</b> | relative pupil size (light pulse)  | <i>n</i> = 11 mice, each tested with and without vMT activation |        |                                    |                        |                  |     |
|                  | 0s, laser off vs on (vMT activate) |                                                                 | passed | Paired <i>t</i> -test (two-tailed) | <i>t</i> =5.007 df=10  | <i>P</i> =0.0005 | *** |
|                  | 5s, off v on                       |                                                                 | passed | Paired <i>t</i> -test (two-tailed) | <i>t</i> =3.192 df=10  | <i>P</i> =0.0096 | **  |
|                  | 10s, off v on                      |                                                                 | passed | Paired <i>t</i> -test (two-tailed) | <i>t</i> =0.8286 df=10 | <i>P</i> =0.4267 | ns  |
|                  | 15s, off v on                      |                                                                 | passed | Paired <i>t</i> -test (two-tailed) | <i>t</i> =0.4587 df=10 | <i>P</i> =0.6562 | ns  |
|                  | 20s, off v on                      |                                                                 | passed | Paired <i>t</i> -test (two-tailed) | <i>t</i> =0.1668 df=10 | <i>P</i> =0.8708 | ns  |
|                  | 25s, off v on                      |                                                                 | passed | Paired <i>t</i> -test (two-tailed) | <i>t</i> =0.2063 df=10 | <i>P</i> =0.8407 | ns  |
|                  | 30s, off v on                      |                                                                 | passed | Paired <i>t</i> -test (two-tailed) | <i>t</i> =0.4083 df=10 | <i>P</i> =0.6917 | ns  |
|                  | 35s, off v on                      |                                                                 | passed | Paired <i>t</i> -test (two-tailed) | <i>t</i> =0.1032 df=10 | <i>P</i> =0.9199 | ns  |
|                  | 40s, off v on                      |                                                                 | passed | Paired <i>t</i> -test (two-tailed) | <i>t</i> =1.764 df=10  | <i>P</i> =0.1083 | ns  |
|                  | 45s, off v on                      |                                                                 | passed | Paired <i>t</i> -test (two-tailed) | <i>t</i> =2.737 df=10  | <i>P</i> =0.0210 | *   |
|                  | 50s, off v on                      |                                                                 | passed | Paired <i>t</i> -test (two-tailed) | <i>t</i> =3.419 df=10  | <i>P</i> =0.0066 | **  |
|                  | 55s, off v on                      |                                                                 | passed | Paired <i>t</i> -test (two-tailed) | <i>t</i> =3.855 df=10  | <i>P</i> =0.0032 | **  |
|                  | 60s, off v on                      |                                                                 | passed | Paired <i>t</i> -test (two-tailed) | <i>t</i> =4.044 df=10  | <i>P</i> =0.0023 | **  |
|                  |                                    |                                                                 |        |                                    |                        |                  |     |
| <b>Figure 5f</b> | relative pupil size constant light |                                                                 |        |                                    |                        |                  |     |
|                  | vMT-to-PFC with v without CNO      | <i>n</i> = 12 vMT-to-PFC                                        | passed | Paired <i>t</i> -test (two-tailed) | <i>t</i> =2.821 df=11  | <i>P</i> =0.0166 | *   |
|                  | vMT-to-BLA with v without CNO      | <i>n</i> = 9 vMT-to-BLA                                         | passed | Paired <i>t</i> -test (two-tailed) | <i>t</i> =0.01326 df=8 | <i>P</i> =0.9897 | ns  |

|                  |                     |                                                                 |        |                                      |                        |                  |    |
|------------------|---------------------|-----------------------------------------------------------------|--------|--------------------------------------|------------------------|------------------|----|
| <b>Figure 5h</b> | relative heart rate | <i>n</i> = 8 mice ChR2 activate; <i>n</i> =13 mice XFP controls |        |                                      |                        |                  |    |
|                  | 20s, ChR2 v XFP     |                                                                 | passed | Unpaired <i>t</i> -test (two-tailed) | <i>t</i> =3.244 df=19  | <i>P</i> =0.0043 | ** |
|                  | 30s, ChR2 v XFP     |                                                                 | passed | Unpaired <i>t</i> -test (two-tailed) | <i>t</i> =2.923 df=19  | <i>P</i> =0.0087 | ** |
|                  | 40s, ChR2 v XFP     |                                                                 | passed | Unpaired <i>t</i> -test (two-tailed) | <i>t</i> =3.862 df=19  | <i>P</i> =0.0010 | ** |
|                  | 50s, ChR2 v XFP     |                                                                 | passed | Unpaired <i>t</i> -test (two-tailed) | <i>t</i> =3.653 df=19  | <i>P</i> =0.0017 | ** |
|                  | 60s, ChR2 v XFP     |                                                                 | passed | Unpaired <i>t</i> -test (two-tailed) | <i>t</i> =3.859 df=19  | <i>P</i> =0.0011 | ** |
|                  | 70s, ChR2 v XFP     |                                                                 | passed | Unpaired <i>t</i> -test (two-tailed) | <i>t</i> =2.977 df=19  | <i>P</i> =0.0078 | ** |
|                  | 80s, ChR2 v XFP     |                                                                 | passed | Unpaired <i>t</i> -test (two-tailed) | <i>t</i> =1.651 df=19  | <i>P</i> =0.1153 | ns |
|                  | 90s, ChR2 v XFP     |                                                                 | passed | Unpaired <i>t</i> -test (two-tailed) | <i>t</i> =0.6433 df=19 | <i>P</i> =0.5277 | ns |
|                  | 100s, ChR2 v XFP    |                                                                 | passed | Unpaired <i>t</i> -test (two-tailed) | <i>t</i> =0.3988 df=19 | <i>P</i> =0.6945 | ns |
|                  | 110s, ChR2 v XFP    |                                                                 | passed | Unpaired <i>t</i> -test (two-tailed) | <i>t</i> =0.3878 df=19 | <i>P</i> =0.7025 | ns |
|                  | 120s, ChR2 v XFP    |                                                                 | passed | Unpaired <i>t</i> -test (two-tailed) | <i>t</i> =0.7396 df=19 | <i>P</i> =0.4686 | ns |

|                  |                         |                                                                 |        |                                      |                       |                  |    |
|------------------|-------------------------|-----------------------------------------------------------------|--------|--------------------------------------|-----------------------|------------------|----|
| <b>Figure 5i</b> | relative breathing rate | <i>n</i> = 8 mice ChR2 activate; <i>n</i> =14 mice XFP controls |        |                                      |                       |                  |    |
|                  | ChR2 v XFP              |                                                                 | passed | Unpaired <i>t</i> -test (two-tailed) | <i>t</i> =1.866 df=20 | <i>P</i> =0.0768 | ns |

|                  |      |                                                                  |  |  |  |  |  |
|------------------|------|------------------------------------------------------------------|--|--|--|--|--|
| <b>Figure 5l</b> | RTPP | <i>n</i> = 14 mice ChR2 activate; <i>n</i> =17 mice XFP controls |  |  |  |  |  |
|------------------|------|------------------------------------------------------------------|--|--|--|--|--|

|                      |                                       |                                                                                                                                                  |            |                                                      |                                  |            |     |
|----------------------|---------------------------------------|--------------------------------------------------------------------------------------------------------------------------------------------------|------------|------------------------------------------------------|----------------------------------|------------|-----|
|                      | ChR2 v XFP                            |                                                                                                                                                  | passed     | Unpaired <i>t</i> -test (two-tailed)                 | $t=2.92$ $df=29$                 | $P=0.0067$ | **  |
| <b>Figure 6c</b>     | relative firing rate                  | $n=23$ cells, mice = 4                                                                                                                           |            |                                                      |                                  |            |     |
|                      | pre loom v loom                       |                                                                                                                                                  | not passed | Wilcoxon matched-pairs signed rank test (two-tailed) | $W=276$                          | $P=0.04$   | *   |
| <b>Figure 6d</b>     | relative firing rate per behavior     | rattle, $n=47$ cells; ambulatory, $n=73$ cells; run, $n=56$ cells; freeze $n=67$ cells; all relative to pre-loom, $n=87$ total cells from 4 mice | not passed | Kruskal-Wallis one-way ANOVA                         | Kruskal-Wallis statistic = 22.92 | $P=0.0001$ | *** |
|                      |                                       |                                                                                                                                                  |            | Dunn's multiple comparisons test                     | Mean rank diff.                  |            |     |
|                      | rattling vs pre loom                  |                                                                                                                                                  |            |                                                      | 7.84                             | $P>0.9999$ | ns  |
|                      | ambulatory vs pre loom                |                                                                                                                                                  |            |                                                      | 47.21                            | $P=0.0064$ | **  |
|                      | run vs pre loom                       |                                                                                                                                                  |            |                                                      | -0.5                             | $P>0.9999$ | ns  |
|                      | freeze vs pre pre loom                |                                                                                                                                                  |            |                                                      | -27.46                           | $P=0.2969$ | ns  |
| <b>Figure 6e</b>     | relative firing rate                  | $n=67$ cells from 4 mice                                                                                                                         |            |                                                      |                                  |            |     |
|                      | motile vs immotile                    |                                                                                                                                                  | not passed | Wilcoxon matched-pairs signed rank test (two-tailed) | $W=-1276$                        | $P<0.0001$ | *** |
| <b>Figure 6g</b>     | relative firing rate                  | $n=87$ cell from 4 mice                                                                                                                          | not passed | Kruskal-Wallis one-way ANOVA                         | Kruskal-Wallis statistic = 7.842 | $P=0.0198$ | *   |
|                      |                                       |                                                                                                                                                  |            | Dunn's multiple comparisons test                     | Mean rank diff.                  |            |     |
|                      | loom day 1 v 2                        |                                                                                                                                                  |            |                                                      | 11.48                            | $P=0.3202$ | ns  |
|                      | loom day 1 v 3+                       |                                                                                                                                                  |            |                                                      | 17.04                            | $P=0.0155$ | *   |
|                      | loom day 2 v 3+                       |                                                                                                                                                  |            |                                                      | 5.56                             | $P>0.9999$ | ns  |
| <b>Ext Figure 1e</b> | number of c-Fos+ cells in the vMT     | $n=6, 5, 8$ mice                                                                                                                                 | passed     | one-way ANOVA                                        | $F_{2,16}=30.82$                 | $P<0.0001$ | *** |
|                      | hM4D/CNO vs GFP/CNO                   |                                                                                                                                                  |            | Tukey's multiple comparisons test                    |                                  | $P=0.04$   | *   |
|                      | hM3D/CNO vs GFP/CNO                   |                                                                                                                                                  |            | Tukey's multiple comparisons test                    |                                  | $P=0.0003$ | *** |
|                      | hM3D/CNO vs hM4D/CNO                  |                                                                                                                                                  |            | Tukey's multiple comparisons test                    |                                  | $P<0.0001$ | *** |
| <b>Ext Figure 2a</b> | number of events                      | $n=15, 9, 9, 17, 5$ mice                                                                                                                         |            |                                                      |                                  |            |     |
|                      | tail rattling                         |                                                                                                                                                  | not passed | Quasi-Poisson GLM                                    | $F_{4,50}=1.9375$                | $P=0.1187$ | ns  |
|                      |                                       |                                                                                                                                                  |            | pairwise comparisons                                 |                                  |            |     |
|                      | no treatment vs XFP/CNO               |                                                                                                                                                  |            |                                                      |                                  | $P=0.635$  | ns  |
|                      | no treatment vs CAV/XFP/CNO           |                                                                                                                                                  |            |                                                      |                                  | $P=0.635$  | ns  |
|                      | no treatment vs CAV/hM3D/wit hout CNO |                                                                                                                                                  |            |                                                      |                                  | $P=0.139$  | ns  |
|                      | no treatment vs XFP/optrode           |                                                                                                                                                  |            |                                                      |                                  | $P=0.103$  | ns  |
| <b>Ext Figure 2b</b> | number of events                      | $n=15, 9, 9, 17, 5$ mice                                                                                                                         |            |                                                      |                                  |            |     |



|  |                                       |  |            |                      |                    |            |    |
|--|---------------------------------------|--|------------|----------------------|--------------------|------------|----|
|  | running                               |  | not passed | Poisson GLM          | $X^2_{4,50} = 1.1$ | $P=0.8938$ | ns |
|  |                                       |  |            | pairwise comparisons |                    |            |    |
|  | no treatment vs XFP/CNO               |  |            |                      |                    | $P=0.5875$ | ns |
|  | no treatment vs CAV/XFP/CNO           |  |            |                      |                    | $P=0.8703$ | ns |
|  | no treatment vs CAV/hM3D/wit hout CNO |  |            |                      |                    | $P=0.5210$ | ns |
|  | no treatment vs XFP/optrode           |  |            |                      |                    | $P=0.9584$ | ns |

|                      |                                       |                           |            |                                  |                                  |              |    |
|----------------------|---------------------------------------|---------------------------|------------|----------------------------------|----------------------------------|--------------|----|
| <b>Ext Figure 2c</b> | % of time                             | $n= 15, 9, 9, 17, 5$ mice |            |                                  |                                  |              |    |
|                      | freezing                              |                           | not passed | Kruskal-Wallis one-way ANOVA     | Kruskal-Wallis statistic = 5.802 | $P = 0.2144$ | ns |
|                      |                                       |                           |            | Dunn's multiple comparisons test | Mean rank diff.                  |              |    |
|                      | no treatment vs XFP/CNO               |                           |            |                                  | 2.356                            | $P>0.9999$   | ns |
|                      | no treatment vs CAV/XFP/CNO           |                           |            |                                  | 3.3                              | $P>0.9999$   | ns |
|                      | no treatment vs CAV/hM3D/wit hout CNO |                           |            |                                  | -12.2                            | $P=0.5208$   | ns |
|                      | no treatment vs XFP/optrode           |                           |            |                                  | 6.418                            | $P=0.9835$   | ns |

|                      |                                       |                           |            |                                  |                                  |              |    |
|----------------------|---------------------------------------|---------------------------|------------|----------------------------------|----------------------------------|--------------|----|
| <b>Ext Figure 2d</b> | % of time                             | $n= 15, 9, 9, 17, 5$ mice |            |                                  |                                  |              |    |
|                      | hiding                                |                           | not passed | Kruskal-Wallis one-way ANOVA     | Kruskal-Wallis statistic = 3.249 | $P = 0.5170$ | ns |
|                      |                                       |                           |            | Dunn's multiple comparisons test | Mean rank diff.                  |              |    |
|                      | no treatment vs XFP/CNO               |                           |            |                                  | 0.2778                           | $P>0.9999$   | ns |
|                      | no treatment vs CAV/XFP/CNO           |                           |            |                                  | 2.333                            | $P>0.9999$   | ns |
|                      | no treatment vs CAV/hM3D/wit hout CNO |                           |            |                                  | 11.33                            | $P=0.5649$   | ns |
|                      | no treatment vs XFP/optrode           |                           |            |                                  | -2.02                            | $P>0.9999$   | ns |

|                      |                               |                 |            |                                |          |              |    |
|----------------------|-------------------------------|-----------------|------------|--------------------------------|----------|--------------|----|
| <b>Ext Figure 2i</b> | % of time M v F controls +CNO | $n= 10, 9$ mice |            |                                |          |              |    |
|                      | freezing M v F                |                 | not passed | Mann-Whitney test (two-tailed) | $U=44.5$ | $P = 0.9781$ | ns |
|                      | hiding M v F                  |                 | not passed | Mann-Whitney test (two-tailed) | $U=39$   | $P = 0.6254$ | ns |
|                      | ambulatory M v F              |                 | not passed | Mann-Whitney test (two-tailed) | $U=38.5$ | $P = 0.6132$ | ns |
|                      | running M v F                 |                 | not passed | Mann-Whitney test (two-tailed) | $U=45$   | $P > 0.9999$ | ns |
|                      | rattling M v F                |                 | not passed | Mann-Whitney test (two-tailed) | $U=45$   | $P > 0.9999$ | ns |

|                      |                           |                 |            |                                |          |              |    |
|----------------------|---------------------------|-----------------|------------|--------------------------------|----------|--------------|----|
| <b>Ext Figure 2j</b> | % of time M v F hM3D +CNO | $n= 5, 10$ mice |            |                                |          |              |    |
|                      | freezing M v F            |                 | not passed | Mann-Whitney test (two-tailed) | $U=14$   | $P = 0.2065$ | ns |
|                      | hiding M v F              |                 | not passed | Mann-Whitney test (two-tailed) | $U=16.5$ | $P = 0.2674$ | ns |
|                      | ambulatory M v F          |                 | not passed | Mann-Whitney test (two-tailed) | $U=16.5$ | $P = 0.3243$ | ns |
|                      | running M v F             |                 | not passed | Mann-Whitney test (two-tailed) | $U=22.5$ | $P = 0.7855$ | ns |
|                      | rattling M v F            |                 | not passed | Mann-Whitney test (two-tailed) | $U=19$   | $P = 0.4922$ | ns |

|                      |                                     |              |            |                                |        |           |    |
|----------------------|-------------------------------------|--------------|------------|--------------------------------|--------|-----------|----|
| <b>Ext Figure 2k</b> | % of time M v F controls+ sham stim | n= 8, 9 mice |            |                                |        |           |    |
|                      | freezing M v F                      |              | not passed | Mann-Whitney test (two-tailed) | U=33   | P =0.8002 | ns |
|                      | hiding M v F                        |              | not passed | Mann-Whitney test (two-tailed) | U=31.5 | P =0.6522 | ns |
|                      | ambulatory M v F                    |              | not passed | Mann-Whitney test (two-tailed) | U=33   | P =0.7957 | ns |
|                      | running M v F                       |              | not passed | Mann-Whitney test (two-tailed) | U=33.5 | P >0.9999 | ns |
|                      | rattling M v F                      |              | not passed | Mann-Whitney test (two-tailed) | U=32.5 | P =0.7501 | ns |

|                      |                                     |              |            |                                |        |           |    |
|----------------------|-------------------------------------|--------------|------------|--------------------------------|--------|-----------|----|
| <b>Ext Figure 2j</b> | % of time M v F controls+ sham stim | n= 8, 9 mice |            |                                |        |           |    |
|                      | freezing M v F                      |              | not passed | Mann-Whitney test (two-tailed) | U=25.5 | P =0.2643 | ns |
|                      | hiding M v F                        |              | not passed | Mann-Whitney test (two-tailed) | U=24.5 | P =0.2788 | ns |
|                      | ambulatory M v F                    |              | not passed | Mann-Whitney test (two-tailed) | U=26.5 | P =0.3814 | ns |
|                      | running M v F                       |              | not passed | Mann-Whitney test (two-tailed) | U=30.5 | P =0.6857 | ns |
|                      | rattling M v F                      |              | not passed | Mann-Whitney test (two-tailed) | U=30.5 | P =0.6072 |    |

|                      |                                  |               |            |                                |        |           |    |
|----------------------|----------------------------------|---------------|------------|--------------------------------|--------|-----------|----|
| <b>Ext Figure 3g</b> | % of time vMT-to-NA              | n= 14, 3 mice |            |                                |        |           |    |
|                      | freezing vMT-to-NA vs controls   |               | not passed | Mann-Whitney test (two-tailed) | U=20   | P =0.9324 | ns |
|                      | hiding vMT-to-NA vs controls     |               | not passed | Mann-Whitney test (two-tailed) | U=20   | P =0.9471 | ns |
|                      | ambulatory vMT-to-NA vs controls |               | not passed | Mann-Whitney test (two-tailed) | U=12.5 | P =0.3118 | ns |
|                      | running vMT-to-NA vs controls    |               | not passed | Mann-Whitney test (two-tailed) | U=14.5 | P =0.5368 | ns |
|                      | rattling vMT-to-NA vs controls   |               | not passed | Mann-Whitney test (two-tailed) | U=15   | P =0.5412 | ns |

|                      |                     |              |            |                                |     |          |    |
|----------------------|---------------------|--------------|------------|--------------------------------|-----|----------|----|
| <b>Ext Figure 4b</b> | number of vMT cells | n= 4, 4 mice |            |                                |     |          |    |
|                      | PFC vs BLA          |              | not passed | Mann-Whitney test (two-tailed) | U=7 | P 0.8857 | ns |

|                      |                                |                    |  |                     |  |          |    |
|----------------------|--------------------------------|--------------------|--|---------------------|--|----------|----|
| <b>Ext Figure 5a</b> | % of mice rattling             | n= 14, 8,8, 5 mice |  |                     |  |          |    |
|                      | controls vs. vMT-BLA           |                    |  | Fisher's exact test |  | P=0.6106 | ns |
|                      | controls vs. vMT-PFC           |                    |  | Fisher's exact test |  | P>0.9999 | ns |
|                      | controls vs. vMT-PFC terminals |                    |  | Fisher's exact test |  | P=0.4028 | ns |

|                      |                                  |                         |  |                     |  |          |     |
|----------------------|----------------------------------|-------------------------|--|---------------------|--|----------|-----|
| <b>Ext Figure 5b</b> | % of rattling events in the open | n= 14, 1,16, 13 rattles |  |                     |  |          |     |
|                      | controls vs. vMT-BLA             |                         |  | Fisher's exact test |  | P=0.1333 | ns  |
|                      | controls vs. vMT-PFC             |                         |  | Fisher's exact test |  | P=0.0860 | ns  |
|                      | controls vs. vMT-PFC terminals   |                         |  | Fisher's exact test |  | P<0.0001 | *** |

|                      |                                |                    |  |                     |  |          |   |
|----------------------|--------------------------------|--------------------|--|---------------------|--|----------|---|
| <b>Ext Figure 5c</b> | % of running in the open       | n= 5, 1, 2, 6 runs |  |                     |  |          |   |
|                      | controls vs. vMT-PFC terminals |                    |  | Fisher's exact test |  | P=0.0152 | * |

|                      |                                                        |                                 |            |                                      |                                  |            |    |
|----------------------|--------------------------------------------------------|---------------------------------|------------|--------------------------------------|----------------------------------|------------|----|
| <b>Ext Figure 5d</b> | % of mice rattling                                     | $n= 17, 17, 15$ mice            |            |                                      |                                  |            |    |
|                      | controls vs. co-activate                               |                                 |            | Fisher's exact test                  |                                  | $P=0.2818$ | ns |
|                      | controls vs. pre-activate                              |                                 |            | Fisher's exact test                  |                                  | $P=0.2907$ | ns |
|                      | pre-activate vs. co-activate                           |                                 |            | Fisher's exact test                  |                                  | $P>0.9999$ | ns |
| <b>Ext Figure 5e</b> | % of rattling events in the open                       | $n= 21, 67, 46$ rattles         |            |                                      |                                  |            |    |
|                      | controls vs. co-activate                               |                                 |            | Fisher's exact test                  |                                  | $P>0.9999$ | ns |
|                      | controls vs. pre-activate                              |                                 |            | Fisher's exact test                  |                                  | $P=0.0364$ | *  |
|                      | pre-activate vs. co-activate                           |                                 |            | Fisher's exact test                  |                                  | $P=0.0064$ | ** |
| <b>Ext Figure 5f</b> | % of running in the open                               | $n= 7, 23, 15$ runs             |            |                                      |                                  |            |    |
|                      | controls vs. co-activate                               |                                 |            | Fisher's exact test                  |                                  | $P=0.0242$ | *  |
|                      | controls vs. pre-activate                              |                                 |            | Fisher's exact test                  |                                  | $P=0.0225$ | *  |
|                      | pre-activate vs. co-activate                           |                                 |            | Fisher's exact test                  |                                  | $P>0.9999$ | ns |
| <b>Ext Figure 6b</b> | % of time freezing (cat odor) controls v chr2 activate | $n= 7, 9$ mice                  | not passed | Mann-Whitney test (two-tailed)       | $U=10$                           | $P=0.0212$ | *  |
| <b>Ext Figure 6c</b> | % of time avoiding (cat odor) controls v chr2 activate | $n= 7, 9$ mice                  | passed     | Unpaired <i>t</i> -test (two-tailed) | $t=2.82$ $df=14$                 | $P=0.0136$ | *  |
| <b>Ext Figure 6e</b> | % shallow choice                                       | $n= 14, 15, 9$ mice             | not passed | Kruskal-Wallis one-way ANOVA         | Kruskal-Wallis statistic = 2,248 | $P=0.3250$ | ns |
|                      |                                                        |                                 |            | Dunn's multiple comparisons test     | Mean rank diff.                  |            |    |
|                      | controls vs. hM4D                                      |                                 |            |                                      | 4.786                            | $P=0.4423$ | ns |
|                      | controls vs. hM3D                                      |                                 |            |                                      | 3.786                            | $P=0.9567$ | ns |
|                      | hM3D vs. hM4D                                          |                                 |            |                                      | 1                                | $P>0.9999$ | ns |
| <b>Ext Figure 6g</b> | relative activity controls v chr2 activate             | $n= 7, 7$ mice                  | not passed | Mann-Whitney test (two-tailed)       | $U=11$                           | $P=0.0973$ | ns |
| <b>Ext Figure 6i</b> | average tail rattling events                           | $n= 14, 7$ mice; tested 2 times | not passed | Mann-Whitney test (two-tailed)       | $U=38$                           | $P=0.2800$ | ns |
| <b>Ext Figure 6j</b> | % mice attacking                                       | $n= 14, 7$ mice                 |            | Fisher's exact test                  |                                  | $P>0.9999$ | ns |
| <b>Ext Figure 6k</b> | latency to attack                                      | $n= 7, 3$ mice                  | not passed | Mann-Whitney test (two-tailed)       | $U=10$                           | $P>0.9999$ | ns |
| <b>Ext Figure 6l</b> | % time in center                                       |                                 |            |                                      |                                  |            |    |
|                      | Chr2, laser on v off                                   | $n= 10$ mice Chr2               | passed     | Paired <i>t</i> -test (two-tailed)   | $t=0.624$ $df=9$                 | $P=0.5481$ | ns |

|  |                     |                |        |                                    |               |           |    |
|--|---------------------|----------------|--------|------------------------------------|---------------|-----------|----|
|  | XFP, laser on v off | n= 10 mice XFP | passed | Paired <i>t</i> -test (two-tailed) | t=0.1483 df=9 | P =0.8854 | ns |
|--|---------------------|----------------|--------|------------------------------------|---------------|-----------|----|

|                      |                      |                                                |        |                                    |              |           |    |
|----------------------|----------------------|------------------------------------------------|--------|------------------------------------|--------------|-----------|----|
| <b>Ext Figure 6n</b> | % time in center     |                                                |        |                                    |              |           |    |
|                      | Chr2, laser on v off | n= 10 mice Chr2, relative to XFP (dashed line) | passed | Paired <i>t</i> -test (two-tailed) | t=1.742 df=9 | P =0.1154 | ns |

|                      |                                               |                                              |        |                                    |                |           |    |
|----------------------|-----------------------------------------------|----------------------------------------------|--------|------------------------------------|----------------|-----------|----|
| <b>Ext Figure 7a</b> | relative pupil size (light pulse) in controls | n= 14 mice, each tested with and without CNO |        |                                    |                |           |    |
|                      | 0s, XFP CNO v no CNO                          |                                              | passed | Paired <i>t</i> -test (two-tailed) | t=0.6874 df=13 | P =0.5039 | ns |
|                      | 5s, XFP CNO v no CNO                          |                                              | passed | Paired <i>t</i> -test (two-tailed) | t=1.066 df=13  | P =0.3058 | ** |
|                      | 10s, XFP CNO v no CNO                         |                                              | passed | Paired <i>t</i> -test (two-tailed) | t=1.859 df=13  | P =0.0858 | ns |
|                      | 15s, XFP CNO v no CNO                         |                                              | passed | Paired <i>t</i> -test (two-tailed) | t=1.47 df=13   | P =0.1652 | ns |
|                      | 20s, XFP CNO v no CNO                         |                                              | passed | Paired <i>t</i> -test (two-tailed) | t=1.574 df=13  | P =0.1394 | ns |
|                      | 25s, XFP CNO v no CNO                         |                                              | passed | Paired <i>t</i> -test (two-tailed) | t=1.498 df=13  | P =0.1580 | ns |
|                      | 30s, XFP CNO v no CNO                         |                                              | passed | Paired <i>t</i> -test (two-tailed) | t=1.773 df=13  | P =0.0996 | ns |
|                      | 35s, XFP CNO v no CNO                         |                                              | passed | Paired <i>t</i> -test (two-tailed) | t=1.489 df=13  | P =0.1603 | ns |
|                      | 40s, XFP CNO v no CNO                         |                                              | passed | Paired <i>t</i> -test (two-tailed) | t=1.401 df=13  | P =0.1847 | ns |
|                      | 45s, XFP CNO v no CNO                         |                                              | passed | Paired <i>t</i> -test (two-tailed) | t=0.0605 df=13 | P =0.9257 | ns |
|                      | 50s, XFP CNO v no CNO                         |                                              | passed | Paired <i>t</i> -test (two-tailed) | t=0.4354 df=13 | P =0.6704 | ns |
|                      | 55s, XFP CNO v no CNO                         |                                              | passed | Paired <i>t</i> -test (two-tailed) | t=0.6405 df=13 | P =0.5330 | ns |
|                      | 60s, XFP CNO v no CNO                         |                                              | passed | Paired <i>t</i> -test (two-tailed) | t=0.1749 df=13 | P =0.8639 | ns |

|                      |                                                |                                              |        |                                    |               |            |     |
|----------------------|------------------------------------------------|----------------------------------------------|--------|------------------------------------|---------------|------------|-----|
| <b>Ext Figure 7b</b> | relative pupil size (light pulse) in hM3D mice | n= 15 mice, each tested with and without CNO |        |                                    |               |            |     |
|                      | 0s, hM3D CNO v no CNO                          |                                              | passed | Paired <i>t</i> -test (two-tailed) | t=4.172 df=14 | P =0.00094 | *** |
|                      | 5s, hM3D CNO v no CNO                          |                                              | passed | Paired <i>t</i> -test (two-tailed) | t=3.865 df=14 | P =0.00017 | **  |
|                      | 10s, hM3D CNO v no CNO                         |                                              | passed | Paired <i>t</i> -test (two-tailed) | t=4.498 df=14 | P =0.0005  | *** |
|                      | 15s, hM3D CNO v no CNO                         |                                              | passed | Paired <i>t</i> -test (two-tailed) | t=4.696 df=14 | P =0.00034 | *** |
|                      | 20s, hM3D CNO v no CNO                         |                                              | passed | Paired <i>t</i> -test (two-tailed) | t=4.392 df=14 | P =0.00061 | *** |
|                      | 25s, hM3D CNO v no CNO                         |                                              | passed | Paired <i>t</i> -test (two-tailed) | t=4.341 df=14 | P =0.00068 | *** |
|                      | 30s, hM3D CNO v no CNO                         |                                              | passed | Paired <i>t</i> -test (two-tailed) | t=5.334 df=14 | P =0.00011 | *** |
|                      | 35s, hM3D CNO v no CNO                         |                                              | passed | Paired <i>t</i> -test (two-tailed) | t=4.782 df=14 | P =0.00029 | *** |
|                      | 40s, hM3D CNO v no CNO                         |                                              | passed | Paired <i>t</i> -test (two-tailed) | t=2.52 df=14  | P =0.0244  | *   |
|                      | 45s, hM3D CNO v no CNO                         |                                              | passed | Paired <i>t</i> -test (two-tailed) | t=3.087 df=14 | P =0.0080  | **  |
|                      | 50s, hM3D CNO v no CNO                         |                                              | passed | Paired <i>t</i> -test (two-tailed) | t=1.633 df=14 | P =0.124   | ns  |

|  |                           |  |        |                                    |                |                 |    |
|--|---------------------------|--|--------|------------------------------------|----------------|-----------------|----|
|  | 55s, hM3D CNO<br>v no CNO |  | passed | Paired <i>t</i> -test (two-tailed) | t=0.9465 df=14 | <i>P</i> =0.359 | ns |
|  | 60s, hM3D CNO<br>v no CNO |  | passed | Paired <i>t</i> -test (two-tailed) | t=0.5985 df=14 | <i>P</i> =0.559 | ns |

|                      |                                                      |                                                           |        |                                    |               |                  |    |
|----------------------|------------------------------------------------------|-----------------------------------------------------------|--------|------------------------------------|---------------|------------------|----|
| <b>Ext Figure 7c</b> | relative pupil size<br>(light pulse) in<br>hM4D mice | <i>n</i> = 9 mice, each<br>tested with and<br>without CNO |        |                                    |               |                  |    |
|                      | 0s, hM4D CNO v<br>no CNO                             |                                                           | passed | Paired <i>t</i> -test (two-tailed) | t=0.3019 df=8 | <i>P</i> =0.7705 | ns |
|                      | 5s, hM4D CNO v<br>no CNO                             |                                                           | passed | Paired <i>t</i> -test (two-tailed) | t=0.6862 df=8 | <i>P</i> =0.5120 | ns |
|                      | 10s, hM4D CNO<br>v no CNO                            |                                                           | passed | Paired <i>t</i> -test (two-tailed) | t=0.8249 df=8 | <i>P</i> =0.4333 | ns |
|                      | 15s, hM4D CNO<br>v no CNO                            |                                                           | passed | Paired <i>t</i> -test (two-tailed) | t=1.118 df=8  | <i>P</i> =0.2960 | ns |
|                      | 20s, hM4D CNO<br>v no CNO                            |                                                           | passed | Paired <i>t</i> -test (two-tailed) | t=0.9909 df=8 | <i>P</i> =0.3508 | ns |
|                      | 25s, hM4D CNO<br>v no CNO                            |                                                           | passed | Paired <i>t</i> -test (two-tailed) | t=1.205 df=8  | <i>P</i> =0.2627 | ns |
|                      | 30s, hM4D CNO<br>v no CNO                            |                                                           | passed | Paired <i>t</i> -test (two-tailed) | t=1.205 df=8  | <i>P</i> =0.2584 | ns |
|                      | 35s, hM4D CNO<br>v no CNO                            |                                                           | passed | Paired <i>t</i> -test (two-tailed) | t=1.596 df=8  | <i>P</i> =0.1491 | ns |
|                      | 40s, hM4D CNO<br>v no CNO                            |                                                           | passed | Paired <i>t</i> -test (two-tailed) | t=1.088 df=8  | <i>P</i> =0.3084 | ns |
|                      | 45s, hM4D CNO<br>v no CNO                            |                                                           | passed | Paired <i>t</i> -test (two-tailed) | t=2.228 df=8  | <i>P</i> =0.0565 | ns |
|                      | 50s, hM4D CNO<br>v no CNO                            |                                                           | passed | Paired <i>t</i> -test (two-tailed) | t=3.487 df=8  | <i>P</i> =0.0082 | ** |
|                      | 55s, hM4D CNO<br>v no CNO                            |                                                           | passed | Paired <i>t</i> -test (two-tailed) | t=3.885 df=8  | <i>P</i> =0.0046 | ** |
|                      | 60s, hM4D CNO<br>v no CNO                            |                                                           | passed | Paired <i>t</i> -test (two-tailed) | t=1.037 df=8  | <i>P</i> =0.3300 | ns |

|                      |                                       |                                            |            |                                   |                                     |                  |     |
|----------------------|---------------------------------------|--------------------------------------------|------------|-----------------------------------|-------------------------------------|------------------|-----|
| <b>Ext Figure 7e</b> | relative pupil size<br>constant light | <i>n</i> = 15 hM3D, 14<br>XFP, 9 hM4D mice | not passed | Kruskal-Wallis one-way ANOVA      | Kruskal-Wallis<br>statistic = 11.29 | <i>P</i> =0.0035 | **  |
|                      |                                       |                                            |            | Dunn's multiple comparisons test  | Mean rank diff.                     |                  |     |
|                      | post CNO hM3D<br>v XFP                |                                            |            |                                   | 7.545                               | <i>P</i> =0.0819 | ns  |
|                      | post CNO hM3D<br>v hM4D               |                                            |            |                                   | 11.38                               | <i>P</i> =0.0046 | **  |
|                      | post CNO XFP<br>v hM4D                |                                            |            |                                   | 3.833                               | <i>P</i> =0.9895 | ns  |
| <b>Ext Figure 7f</b> | relative pupil size<br>constant dark  | <i>n</i> = 15 hM3D, 14<br>XFP, 9 hM4D mice | passed     | one-way ANOVA                     | $F_{2,35}=9.718$                    | <i>P</i> =0.0004 | *** |
|                      | post CNO hM3D<br>v XFP                |                                            |            | Tukey's multiple comparisons test |                                     | <i>P</i> =0.0008 | *** |
|                      | post CNO hM3D<br>v hM4D               |                                            |            | Tukey's multiple comparisons test |                                     | <i>P</i> =0.0060 | **  |
|                      | post CNO XFP<br>v hM4D                |                                            |            | Tukey's multiple comparisons test |                                     | <i>P</i> =0.9668 | ns  |

|                        |                                        |                                                                        |        |                                      |               |                  |    |
|------------------------|----------------------------------------|------------------------------------------------------------------------|--------|--------------------------------------|---------------|------------------|----|
| <b>Ext Data Fig 7g</b> | relative pupil size<br>(constant dark) | <i>n</i> = 11 mice Chr2<br>activate; <i>n</i> =12 mice<br>XFP controls |        |                                      |               |                  |    |
|                        | Chr2 v XFP                             |                                                                        | passed | Unpaired <i>t</i> -test (two-tailed) | t=3.375 df=21 | <i>P</i> =0.0029 | ** |

|                      |                                          |                            |        |               |                  |                  |     |
|----------------------|------------------------------------------|----------------------------|--------|---------------|------------------|------------------|-----|
| <b>Ext Figure 8b</b> | number of c-<br>Fos+ cells in the<br>vMT | <i>n</i> = 7,6, 10, 5 mice | passed | one-way ANOVA | $F_{3,24}=10.36$ | <i>P</i> =0.0001 | *** |
|----------------------|------------------------------------------|----------------------------|--------|---------------|------------------|------------------|-----|

|  |                     |  |  |                                   |  |            |     |
|--|---------------------|--|--|-----------------------------------|--|------------|-----|
|  | above vs. none      |  |  | Tukey's multiple comparisons test |  | $P=0.0002$ | *** |
|  | above vs. below     |  |  | Tukey's multiple comparisons test |  | $P=0.0031$ | **  |
|  | above vs. habituate |  |  | Tukey's multiple comparisons test |  | $P=0.002$  | **  |
|  | none vs. below      |  |  | Tukey's multiple comparisons test |  | $P=0.9735$ | ns  |
|  | none vs. habituate  |  |  | Tukey's multiple comparisons test |  | $P=0.9627$ | ns  |
|  | below vs. habituate |  |  | Tukey's multiple comparisons test |  | $P>0.9999$ | ns  |

|                      |                                  |                   |        |                                   |                  |            |     |
|----------------------|----------------------------------|-------------------|--------|-----------------------------------|------------------|------------|-----|
| <b>Ext Figure 8c</b> | number of c-Fos+ cells in the Xi | $n= 7,10, 5$ mice | passed | one-way ANOVA                     | $F_{2,19}=19.75$ | $P<0.0001$ | *** |
|                      | above vs. none                   |                   |        | Tukey's multiple comparisons test |                  | $P<0.0001$ | *** |
|                      | above vs. below                  |                   |        | Tukey's multiple comparisons test |                  | $P<0.0001$ | *** |
|                      | above vs. habituate              |                   |        | Tukey's multiple comparisons test |                  | $P<0.0001$ | *** |
|                      | none vs. below                   |                   |        | Tukey's multiple comparisons test |                  | $P=0.8767$ | ns  |
|                      | none vs. habituate               |                   |        | Tukey's multiple comparisons test |                  | $P=0.7388$ | ns  |
|                      | below vs. habituate              |                   |        | Tukey's multiple comparisons test |                  | $P=0.9973$ | ns  |

|                       |                                               |                    |            |                      |                   |             |     |
|-----------------------|-----------------------------------------------|--------------------|------------|----------------------|-------------------|-------------|-----|
| <b>Ext Figure 10a</b> | arousal levels                                | $n= 9, 7, 10$ mice |            |                      |                   |             |     |
|                       | tail rattling                                 |                    | not passed | Quasi-Poisson GLM    | $F_{2,23}=14.842$ | $P=0.00007$ | *** |
|                       |                                               |                    |            | pairwise comparisons |                   |             |     |
|                       | rattling in mice with low v moderate arousal  |                    |            |                      |                   | $P=0.02043$ | *   |
|                       | rattling in mice with low v high arousal      |                    |            |                      |                   | $P=0.00225$ | **  |
|                       | rattling in mice with moderate v high arousal |                    |            |                      |                   | $P=0.05603$ | ns  |

|                       |                                              |                    |            |                      |                    |              |     |
|-----------------------|----------------------------------------------|--------------------|------------|----------------------|--------------------|--------------|-----|
| <b>Ext Figure 10b</b> | arousal levels                               | $n= 9, 7, 10$ mice |            |                      |                    |              |     |
|                       | running                                      |                    | not passed | Poisson GLM          | $X^2_{3,31}= 17.7$ | $P=0.000138$ | *** |
|                       |                                              |                    |            | pairwise comparisons |                    |              |     |
|                       | running in mice with low v moderate arousal  |                    |            |                      |                    | $P=0.06065$  | ns  |
|                       | running in mice with low v high arousal      |                    |            |                      |                    | $P=0.00191$  | **  |
|                       | running in mice with moderate v high arousal |                    |            |                      |                    | $P=0.069227$ | ns  |

|                       |                                               |                    |            |                                  |                                  |            |    |
|-----------------------|-----------------------------------------------|--------------------|------------|----------------------------------|----------------------------------|------------|----|
| <b>Ext Figure 10c</b> | arousal levels                                | $n= 9, 7, 10$ mice | not passed | Kruskal-Wallis one-way ANOVA     | Kruskal-Wallis statistic = 0.915 | $P=0.6329$ | ns |
|                       | freezing                                      |                    |            | Dunn's multiple comparisons test | Mean rank diff.                  |            |    |
|                       | freezing in mice with low v moderate arousal  |                    |            |                                  | 3.079                            | $P>0.9999$ | ns |
|                       | freezing in mice with low v high arousal      |                    |            |                                  | 2.322                            | $P>0.9999$ | ns |
|                       | freezing in mice with moderate v high arousal |                    |            |                                  | -0.7571                          | $P>0.9999$ | ns |

|                       |                                             |                          |            |                                  |                                  |                  |                     |
|-----------------------|---------------------------------------------|--------------------------|------------|----------------------------------|----------------------------------|------------------|---------------------|
| <b>Ext Figure 10d</b> | arousal levels                              | <i>n</i> = 9, 7, 10 mice | not passed | Kruskal-Wallis one-way ANOVA     | Kruskal-Wallis statistic = 2.002 | <i>P</i> =0.3676 | ns                  |
|                       | hiding                                      |                          |            | Dunn's multiple comparisons test | Mean rank diff.                  |                  |                     |
|                       | hiding in mice with low v moderate arousal  |                          |            |                                  |                                  | -5.31            | <i>P</i> =0.4770 ns |
|                       | hiding in mice with low v high arousal      |                          |            |                                  |                                  | -1.917           | <i>P</i> >0.9999 ns |
|                       | hiding in mice with moderate v high arousal |                          |            |                                  |                                  | 3.393            | <i>P</i> >0.9999 ns |

|                       |                         |                          |  |                     |  |                  |    |
|-----------------------|-------------------------|--------------------------|--|---------------------|--|------------------|----|
| <b>Ext Figure 10e</b> | arousal levels          | <i>n</i> = 9, 7, 10 mice |  |                     |  |                  |    |
|                       | % of mice tail rattling |                          |  |                     |  |                  |    |
|                       | low v moderate          |                          |  | Fisher's exact test |  | <i>P</i> =0.3147 | ns |
|                       | low v high              |                          |  | Fisher's exact test |  | <i>P</i> =0.0031 | ** |
|                       | moderate v high         |                          |  | Fisher's exact test |  | <i>P</i> =0.1544 | ns |

|                       |                   |                          |  |                     |  |                  |     |
|-----------------------|-------------------|--------------------------|--|---------------------|--|------------------|-----|
| <b>Ext Figure 10f</b> | arousal levels    | <i>n</i> = 9, 7, 10 mice |  |                     |  |                  |     |
|                       | % of mice running |                          |  |                     |  |                  |     |
|                       | low v moderate    |                          |  | Fisher's exact test |  | <i>P</i> =0.0406 | *   |
|                       | low v high        |                          |  | Fisher's exact test |  | <i>P</i> =0.0007 | *** |
|                       | moderate v high   |                          |  | Fisher's exact test |  | <i>P</i> =0.4118 | ns  |

|                       |                    |                          |  |                     |  |                  |    |
|-----------------------|--------------------|--------------------------|--|---------------------|--|------------------|----|
| <b>Ext Figure 10g</b> | arousal levels     | <i>n</i> = 9, 7, 10 mice |  |                     |  |                  |    |
|                       | % of mice freezing |                          |  |                     |  |                  |    |
|                       | low v moderate     |                          |  | Fisher's exact test |  | <i>P</i> >0.9999 | ns |
|                       | low v high         |                          |  | Fisher's exact test |  | <i>P</i> >0.9999 | ns |
|                       | moderate v high    |                          |  | Fisher's exact test |  | <i>P</i> >0.9999 | ns |

|                       |                  |                          |  |                     |  |                  |    |
|-----------------------|------------------|--------------------------|--|---------------------|--|------------------|----|
| <b>Ext Figure 10h</b> | arousal levels   | <i>n</i> = 9, 7, 10 mice |  |                     |  |                  |    |
|                       | % of mice hiding |                          |  |                     |  |                  |    |
|                       | low v moderate   |                          |  | Fisher's exact test |  | <i>P</i> =0.3077 | ns |
|                       | low v high       |                          |  | Fisher's exact test |  | <i>P</i> >0.9999 | ns |
|                       | moderate v high  |                          |  | Fisher's exact test |  | <i>P</i> =0.3382 | ns |
